# Supplementary material for: Bioinformatics analyses of retinoblastoma reveal the retinoblastoma progression subtypes
Source: PeerJ. 2020 May 21;8:e8873. doi: 10.7717/peerj.8873 (PMC7246025; doi:10.7717/peerj.8873)
Supplement: Supplemental Information 9 [file peerj-08-8873-s009.xlsx]

## Sheet: Sheet1
supplementary Table 2: RB subtype specific genes
subtype1	subtype2	subtype3	subtype4	all subtypes
MAP3K8	MAP3K8	MAP3K8	PTGER2	MAP3K8
SULT1C2	SULT1C2	SULT1C2	SULT1C2	SULT1C2
PTGER2	PTGER2	BACE2	CYTIP	PTGER2
BACE2	BACE2	CYTIP	KMO	BACE2
KMO	KMO	CPVL	MAP3K8	KMO
CYTIP	CYTIP	PTGER2	CCL18	CYTIP
GPX8	GPX8	C1S	CPVL	GPX8
FAM110C	FAM110C	FCGR2B	PLBD1	FAM110C
FCGR2B	FCGR2B	KMO	SLAMF8	FCGR2B
CCL18	CCL18	GPX8	SLC47A1	CCL18
CPVL	CPVL	SLC47A1	NCF2	CPVL
CYBRD1	CYBRD1	SLAMF8	ALDH1A1	CYBRD1
PLBD1	PLBD1	CD163	VSIG4	PLBD1
TNFSF13	TNFSF13	MYOF	HSD17B2	TNFSF13
BMP4	BMP4	VSIG4	GPX8	BMP4
CLIC6	CLIC6	CYBRD1	CCL8	CLIC6
SLAMF8	SLAMF8	NCF2	FAM110C	SLAMF8
C1orf168	C1orf168	PYCARD	RARRES1	C1orf168
SLC47A1	SLC47A1	TNFSF13	MITF	SLC47A1
TYR	TYR	CCL18	BMP4	TYR
RARRES1	RARRES1	ITGAM	PYCARD	RARRES1
HMOX1	HMOX1	EVI2B	EVI2B	HMOX1
MYOF	MYOF	LY96	CTSD	MYOF
HSD17B2	HSD17B2	CTSS	LY96	HSD17B2
F13A1	F13A1	F13A1	COL8A2	F13A1
PYCARD	PYCARD	PLBD1	CD163	PYCARD
MGC24103	MGC24103	MITF	CFD	MGC24103
SFRP1	SFRP1	GLIPR1	TIMP3	SFRP1
ITGAM	ITGAM	C1orf168	SERPINE1	ITGAM
CXCL14	CXCL14	ALDH1A1	THBS2	CXCL14
GLIPR1	GLIPR1	SQRDL	PLA2G7	GLIPR1
ALDH1A1	ALDH1A1	HMOX1	CHST11	ALDH1A1
ADORA3	ADORA3	EVI2A	LAPTM5	ADORA3
NCF2	NCF2	BMP4	C1QC	NCF2
OCA2	OCA2	FAM110C	TMEM35	OCA2
KCNJ13	KCNJ13	LY86	HBG1 /// HBG2	KCNJ13
EMP3	EMP3	TYR	PLP1	EMP3
LY96	LY96	CLIC6	AGT	LY96
TPD52L1	TPD52L1	CTSD	ANK3	TPD52L1
MITF	MITF	GIMAP2	ID4	MITF
SLC39A12	SLC39A12	TNFRSF1A	ATP1A2	SLC39A12
MLANA	MLANA	MS4A6A	RDH12	MLANA
VSIG4	VSIG4	EMP3	SAG	VSIG4
C1S	C1S	ADORA3	NDP	C1S
COL8A2	COL8A2	IER3	SOX9	COL8A2
CTSD	CTSD	GPNMB	DPP10	CTSD
EVI2B	EVI2B	KCNJ13	PTPRZ1	EVI2B
IER3	IER3	MGC24103	CLUL1	IER3
SQRDL	SQRDL	C2orf40	SLC6A1	SQRDL
CFD	CFD	CCL8	GUCA1B	CFD
TMEM27	TMEM27	RARRES1	ROM1	TMEM27
SOSTDC1	SOSTDC1	CTSC	RASGRP1	SOSTDC1
CCL8	CCL8	DHRS3	BCHE	CCL8
TYRP1	TYRP1	SMOC2	CLU	TYRP1
PIR	PIR	BTN3A3	PPEF2	PIR
TMEM140	TMEM140	HSD17B2	EGF	TMEM140
BCMO1	BCMO1	MLANA	GNAT1	BCMO1
EFEMP1	EFEMP1	GPR183	LRRC39	EFEMP1
GIMAP2	GIMAP2	HCLS1	GUCA1C	GIMAP2
TSPO	TSPO	ID3	PLA2G5	TSPO
CTSC	CTSC	TMEM140	PCP4	CTSC
SMOC2	SMOC2	OCA2	GFAP	SMOC2
BTN3A3	BTN3A3	CXCL16	IFIT1	BTN3A3
SLC2A12	SLC2A12	TRPM3	FRZB	SLC2A12
NID2	NID2	HCK	RHO	NID2
HCK	HCK	FCER1G	PTGDS	HCK
COLEC12	COLEC12	CFD	AKR1C3	COLEC12
OLFML2B	OLFML2B	FERMT3	GPR160	OLFML2B
FAP	FAP	COLEC12	USH2A	FAP
CFH	CFH	CXCL14	BCL11A	CFH
TRPM3	TRPM3	C1QA	IMPG1	TRPM3
CTSS	CTSS	IL10RA	INSM2	CTSS
CD163	CD163	BCMO1	CD24	CD163
CSF2RB	CSF2RB	CSF2RB	HLA-DRA	CSF2RB
ARHGEF3	ARHGEF3	GPR34	FABP7	ARHGEF3
MNDA	MNDA	TIMP3	WIF1	MNDA
TNFRSF1A	TNFRSF1A	MPEG1	C3	TNFRSF1A
CXCL16	CXCL16	HLA-DMA	TFF1	CXCL16
EVI2A	EVI2A	FBP1	PDE6A	EVI2A
AIM1	AIM1	CFH	CNGA1	AIM1
CTSK	CTSK	IL33	DNER	CTSK
LY86	LY86	TSPO	SERPINA3	LY86
FERMT3	FERMT3	S100A11	PRSS35	FERMT3
SLC2A10	SLC2A10	CTSK	GPX3	SLC2A10
DHRS3	DHRS3	C1R	RP1	DHRS3
CCR1	CCR1	SOSTDC1	TTR	CCR1
BMP2	BMP2	CCR1	CP	BMP2
BLNK	BLNK	COL8A2	SYNPR	BLNK
C1R	C1R	RCSD1	TF	C1R
IL6	IL6	CSTA	FCGR2B	IL6
FBP1	FBP1	NID2	BACE2	FBP1
ID3	ID3	SLC2A10	MYOF	ID3
RCSD1	RCSD1	EFEMP1	TYR	RCSD1
MS4A6A	MS4A6A	C3AR1	GLIPR1	MS4A6A
IL10RA	IL10RA	OLFML2B	OCA2	IL10RA
HTR2B	HTR2B	ARHGEF3	CLIC6	HTR2B
SERPINE1	SERPINE1	SLC7A7	CTSC	SERPINE1
TIMP3	TIMP3	SFRP1	ITGAM	TIMP3
MAN1A1	MAN1A1	TYRP1	MLANA	MAN1A1
HS3ST2	HS3ST2	LAPTM5	SFRP1	HS3ST2
MICA	MICA	VAMP8	HMOX1	MICA
GPNMB	GPNMB	CFH /// CFHR1	KCNJ13	GPNMB
CSTA	CSTA	BLNK	BCMO1	CSTA
CCDC80	CCDC80	MS4A4A	CSF2RB	CCDC80
GPR34	GPR34	PPAP2B	GPNMB	GPR34
NUPR1	NUPR1	TNFSF13B	GPR183	NUPR1
PPAPDC1A	PPAPDC1A	CASP1	CTSS	PPAPDC1A
S100A11	S100A11	NUPR1	OLFML2B	S100A11
C2orf40	C2orf40	LGALS3BP	EMP3	C2orf40
IL13RA2	IL13RA2	TMEM27	FBP1	IL13RA2
HCLS1	HCLS1	MNDA	TNFSF13	HCLS1
RSPO3	RSPO3	FCGR3B	HCK	RSPO3
RPE65	RPE65	HTR2B	ADORA3	RPE65
PPAP2B	PPAP2B	C1QC	EVI2A	PPAP2B
CFH /// CFHR1	CFH /// CFHR1	SLC2A12	HTR2B	CFH /// CFHR1
YAP1	YAP1	MS4A7	CFH	YAP1
CHST11	CHST11	ITGB2	TMEM27	CHST11
LGALS3BP	LGALS3BP	GIMAP6	C2orf40	LGALS3BP
GULP1	GULP1	BMP2	CSTA	GULP1
C1QA	C1QA	MAN1A1	NID2	C1QA
MPEG1	MPEG1	PIR	FERMT3	MPEG1
FCGR3B	FCGR3B	SLC38A11	MPEG1	FCGR3B
SELENBP1	SELENBP1	RNASE4	AIM1	SELENBP1
KRT18	KRT18	RAB31	GIMAP2	KRT18
TNFSF13B	TNFSF13B	FCGR1B	HTRA4	TNFSF13B
SELM	SELM	HTRA4	TPD52L1	SELM
CEBPD	CEBPD	NMI	MGC24103	CEBPD
HLA-DMA	HLA-DMA	TPD52L1	IL6	HLA-DMA
SLC7A7	SLC7A7	CD14	S100A11	SLC7A7
RNASE4	RNASE4	C5AR1	IL10RA	RNASE4
CTGF	CTGF	YAP1	CCR1	CTGF
CHI3L2	CHI3L2	S100A4	MS4A4A	CHI3L2
THBS2	THBS2	HS3ST2	CXCL16	THBS2
FCER1G	FCER1G	GBP3	ID3	FCER1G
SLC38A11	SLC38A11	SERPINE1	SMOC2	SLC38A11
WNT5A	WNT5A	RPE65	SQRDL	WNT5A
MS4A4A	MS4A4A	RTP4	IL13RA2	MS4A4A
SLC35D3	SLC35D3	SERPING1	LY86	SLC35D3
GBP3	GBP3	IFI16	CYBRD1	GBP3
MLPH	MLPH	RNASE6	C1S	MLPH
SERPING1	SERPING1	MLPH	F13A1	SERPING1
FCGR1B	FCGR1B	IL6	IER3	FCGR1B
SSPN	SSPN	HLA-DRA	C5AR1	SSPN
CYR61	CYR61	SLC39A12	HCLS1	CYR61
IL33	IL33	FAP	FCER1G	IL33
BAMBI	BAMBI	C1QB	RSPO3	BAMBI
PTGDS	PTGDS	MGP	TSPAN8	PTGDS
ANXA3	ANXA3	SELENBP1	RPE65	ANXA3
CH25H	CH25H	TLR1	MLPH	CH25H
LGI1	LGI1	IL13RA2	EFEMP1	LGI1
S100A8	S100A8	RSPO3	PPAPDC1A	S100A8
MS4A7	MS4A7	CHI3L2	CFH /// CFHR1	MS4A7
PPIC	PPIC	SSPN	SLC7A7	PPIC
LAPTM5	LAPTM5	CEBPD	CTSK	LAPTM5
HTRA4	HTRA4	MICA	SLC35D3	HTRA4
C5AR1	C5AR1	VCAM1	KRT18	C5AR1
VAMP8	VAMP8	CH25H	HS3ST2	VAMP8
C3AR1	C3AR1	AQP9	SLC38A11	C3AR1
TSPAN8	TSPAN8	PLA2G4A	S100A8	TSPAN8
GIMAP6	GIMAP6	FZD6	ITGB2	GIMAP6
TLR1	TLR1	PTPRC	C1QA	TLR1
RBMS1	RBMS1	S100A8	TGFB1I1	RBMS1
LOX	LOX	TGFB1I1	GPR143	LOX
BGN	BGN	GJA1	MS4A6A	BGN
TMEM35	TMEM35	PPIC	SOSTDC1	TMEM35
ITGB2	ITGB2	DAB2	CD52	ITGB2
C1QC	C1QC	TRIM22	NTN4	C1QC
MGP	MGP	THBS2	FAM129A	MGP
SELL	SELL	FGL2	TCIRG1	SELL
RAB38	RAB38	DAPL1	ANXA3	RAB38
SNX9	SNX9	RRAS	RAB38	SNX9
CYB5R2	CYB5R2	BGN	TYRP1	CYB5R2
PRELP	PRELP	PTGDS	FCGR3B	PRELP
RRAS	RRAS	HLA-DPA1	VAMP8	RRAS
NMI	NMI	SLC35D3	S100A9	NMI
RARRES2	RARRES2	CXCL12	LOX	RARRES2
ENPP2	ENPP2	CTGF	SLC39A12	ENPP2
VWA5A	VWA5A	PLA2G7	BCL2A1	VWA5A
RAB31	RAB31	TSPAN8	CXCL14	RAB31
DAPL1	DAPL1	SRGN	CTGF	DAPL1
NTN4	NTN4	LGI1	MGP	NTN4
ADAMDEC1	ADAMDEC1	NTN4	BGN	ADAMDEC1
SLC16A4	SLC16A4	CCDC80	ADAMDEC1	SLC16A4
WLS	WLS	CAPG	LGI1	WLS
CXCL12	CXCL12	CCL2	NUPR1	CXCL12
VCAM1	VCAM1	LYZ	HLA-DMA	VCAM1
CSGALNACT1	CSGALNACT1	CYYR1	TNFSF13B	CSGALNACT1
LSR	LSR	SLC16A4	TSPO	LSR
CRYAB	CRYAB	BCL2A1	RNASE4	CRYAB
LXN	LXN	TNFSF10	GPR34	LXN
C1QB	C1QB	CD52	C1R	C1QB
GALNT10	GALNT10	NCEH1	CCL3 /// CCL3L1 /// CCL3L3	GALNT10
TRPM1	TRPM1	CYR61	CD36	TRPM1
PYGL	PYGL	FAM129A	LYZ	PYGL
MAB21L2	MAB21L2	TYROBP	CYR61	MAB21L2
ARHGAP18	ARHGAP18	LXN	IL33	ARHGAP18
ID1	ID1	ADAMDEC1	RNASE6	ID1
EPDR1	EPDR1	TCIRG1	PIR	EPDR1
C3	C3	KRT18	CAPG	C3
PLA2G4A	PLA2G4A	RAB38	CADM2	PLA2G4A
EGR2	EGR2	AIM1	S100A4	EGR2
S100A4	S100A4	METRNL	CYP24A1	S100A4
DKK1	DKK1	VWA5A	CYB5R2	DKK1
TRIM22	TRIM22	LY75	LXN	TRIM22
FAM129A	FAM129A	BAMBI	ODAM	FAM129A
ODAM	ODAM	ENPP2	CYP1B1	ODAM
LY75	LY75	ANXA3	COL3A1	LY75
MAN2A1	MAN2A1	S100A9	FNDC1	MAN2A1
CNTN3	CNTN3	SELM	CD14	CNTN3
TCIRG1	TCIRG1	CSGALNACT1	ENPP2	TCIRG1
DACT1	DACT1	GBP2	C1QB	DACT1
RNASE6	RNASE6	LAMB2	CCL2	RNASE6
CFI	CFI	IFITM1	MNDA	CFI
FNDC1	FNDC1	CRYAB	ERMN	FNDC1
TGFB1I1	TGFB1I1	TM4SF18	SELM	TGFB1I1
ANXA4	ANXA4	LOX	SRGN	ANXA4
RARRES3	RARRES3	SELL	ARHGEF3	RARRES3
PLA2G7	PLA2G7	PRELP	TYROBP	PLA2G7
SPOCK1	SPOCK1	FOXC1	CHIT1	SPOCK1
S100A9	S100A9	GPR143	RBMS1	S100A9
ADAMTS1	ADAMTS1	CEBPB	COLEC12	ADAMTS1
CD14	CD14	ST6GALNAC2	COL6A3	CD14
CCL2	CCL2	GIMAP7	CNGB1	CCL2
HLA-DRA	HLA-DRA	RARRES2	EGR2	HLA-DRA
TFPI2	TFPI2	RARRES3	TMEM45A	TFPI2
IGFBP6	IGFBP6	GBP1	BAMBI	IGFBP6
METRNL	METRNL	PPAPDC1A	GJA1	METRNL
CYP24A1	CYP24A1	TRPM1	ID1	CYP24A1
PPL	PPL	WNT5A	GBP3	PPL
COL3A1	COL3A1	BAG3	MMP7	COL3A1
COL9A3	COL9A3	EPDR1	HBB	COL9A3
BCL2A1	BCL2A1	ANXA4	MAN2A1	BCL2A1
LYZ	LYZ	PYGL	MXRA5	LYZ
CEBPB	CEBPB	CCL3 /// CCL3L1 /// CCL3L3	HBA1 /// HBA2	CEBPB
BAG3	BAG3	ARHGAP18	COL1A2	BAG3
ALDH1A3	ALDH1A3	CFI	VCAM1	ALDH1A3
CAPG	CAPG	IL4I1	RARRES2	CAPG
CD52	CD52	CD36	TFPI2	CD52
CHI3L1	CHI3L1	BST2	GABRG2	CHI3L1
TRIM6	TRIM6	COL3A1	CEBPB	TRIM6
TTR	TTR	WLS	HLA-DQA1	TTR
GJA1	GJA1	EGR2	PTX3	GJA1
GBP2	GBP2	GZMA	RGS1	GBP2
HLA-DPA1	HLA-DPA1	TFPI2	SERPING1	HLA-DPA1
SRGN	SRGN	ZCCHC24	COL15A1	SRGN
GPR143	GPR143	ID1	WLS	GPR143
BTN3A2 /// BTN3A3	BTN3A2 /// BTN3A3	IGFBP6	C15orf48	BTN3A2 /// BTN3A3
IFI16	IFI16	MXRA5	HLA-DPA1	IFI16
TYROBP	TYROBP	PLXDC2	ADRA2A	TYROBP
COL1A2	COL1A2	CYB5R2	CABP5	COL1A2
DSP	DSP	DDX60	GRIA2	DSP
IFITM1	IFITM1	DPP10	PVALB	IFITM1
CCL3 /// CCL3L1 /// CCL3L3	CCL3 /// CCL3L1 /// CCL3L3	FNDC1	VSTM2A	CCL3 /// CCL3L1 /// CCL3L3
MMP7	MMP7	COL1A2	RS1	MMP7
GBP1	GBP1	DKK1	FOS	GBP1
ERMN	ERMN	TTR	NXPH1	ERMN
TMEM200A	TMEM200A	PSMB8	GRM6	TMEM200A
PON2	PON2	PLSCR4	CHI3L1	PON2
ZCCHC24	ZCCHC24	BTN3A2 /// BTN3A3	NEFL	ZCCHC24
HBA1 /// HBA2	HBA1 /// HBA2	ODAM	ISL1	HBA1 /// HBA2
BMPER	BMPER	C3		BMPER
CADM2	CADM2	DTX3L		CADM2
HBG1 /// HBG2	HBG1 /// HBG2	RBMS1		HBG1 /// HBG2
FOS	FOS	EDNRB		FOS
GREM2	GREM2	CHST11		GREM2
HBB	HBB	RGS1		HBB
FZD7	FZD7	FOS		FZD7
NXPH1	NXPH1	CNTN3		NXPH1
COL6A3	COL6A3	GALNT10		COL6A3
SLC16A14	SLC16A14	COL6A3		SLC16A14
LUM	LUM	IFI44		LUM
HLA-DQA1	HLA-DQA1	ALDH1A3		HLA-DQA1
CP	CP	ATP10D		CP
PSMB8	PSMB8	SULF2		PSMB8
SCN2A	SCN2A	ADAMTS1		SCN2A
SPRY2	SPRY2	CYP24A1		SPRY2
CHIT1	CHIT1	DACT1		CHIT1
LOC100288911	LOC100288911	CCND1		LOC100288911
FGF13	FGF13	CHIT1		FGF13
PLSCR4	PLSCR4	LUM		PLSCR4
PLAGL1	PLAGL1	ERMN		PLAGL1
CAV2	CAV2	TMEM45A		CAV2
EGF	EGF	FXYD5		EGF
PHACTR2	PHACTR2	HLA-DQA1		PHACTR2
COL11A1	COL11A1	FAT1		COL11A1
SRPX	SRPX	PLAT		SRPX
KIRREL3	KIRREL3	CAV2		KIRREL3
EGFL6	EGFL6	MAB21L2		EGFL6
RASSF2	RASSF2	PON2		RASSF2
SATB1	SATB1	FAM150B		SATB1
FLJ37786	FLJ37786	SRPX		FLJ37786
RCAN2	RCAN2	CLU		RCAN2
CAV1	CAV1	EGFL6		CAV1
DEFB119	DEFB119	PARP12		DEFB119
RBM24	RBM24	MMP9		RBM24
GUCA1C	GUCA1C	TMEM47		GUCA1C
CD19	CD19	HBG1 /// HBG2		CD19
CTHRC1	CTHRC1	MMP7		CTHRC1
C15orf48	C15orf48	CHI3L1		C15orf48
LOC100130458	LOC100130458	PSMB9		LOC100130458
PTGFR	PTGFR	HBB		PTGFR
PAX6	PAX6	OLFML3		PAX6
IGJ	IGJ	HBA1 /// HBA2		IGJ
CYP1B1	CYP1B1	PCP4		CYP1B1
FRZB	FRZB	COL9A3		FRZB
MXRA5	MXRA5	CCL4		MXRA5
CLU	CLU	CAV1		CLU
ADRA2A	ADRA2A	FZD7		ADRA2A
DCN	DCN	DCN		DCN
RLBP1	RLBP1	OGN		RLBP1
FAM19A2	FAM19A2	FRZB		FAM19A2
SOX8	SOX8	SERPINA3		SOX8
PCP4	PCP4	CP		PCP4
PHLDA1	PHLDA1	INSM2		PHLDA1
SULF1	SULF1	IFIT1		SULF1
RP1	RP1	MX1		RP1
SEC14L5	SEC14L5	C15orf48		SEC14L5
AMIGO2	AMIGO2	COL15A1		AMIGO2
USH2A	USH2A	CYP1B1		USH2A
VSTM2A	VSTM2A	FBLN5		VSTM2A
C8orf46	C8orf46	IFI44L		C8orf46
SERPINA3	SERPINA3	SPOCK1		SERPINA3
VCAN	VCAN	COL11A1		VCAN
SOX7	SOX7	AKR1C3		SOX7
GPX3	GPX3	TMEM200A		GPX3
SLFN13	SLFN13	TAP1		SLFN13
SYNPR	SYNPR	PRSS33		SYNPR
TPBG	TPBG	SULF1		TPBG
NPVF	NPVF	CTHRC1		NPVF
GPR183	CD24	PLP1		GPR183
CASP1	RAMP1	SOX9		CASP1
RTP4	BCL11A	SLC16A14		RTP4
AQP9	TFF1	GFAP		AQP9
FZD6	SSTR2	DSP		FZD6
PTPRC	HS3ST4	CXCL10		PTPRC
DAB2	INSM2	GPX3		DAB2
FGL2	SLC16A9	IGJ		FGL2
CYYR1	GUCA1B	PTPRZ1		CYYR1
TNFSF10	SLC27A6	RLBP1		TNFSF10
NCEH1	ROBO1	RCAN2		NCEH1
LAMB2	PRAME	DCX		LAMB2
TM4SF18		PAX6		TM4SF18
FOXC1		TFF1		FOXC1
ST6GALNAC2		POU4F2		ST6GALNAC2
GIMAP7		GRM6		GIMAP7
IL4I1		EGF		IL4I1
CD36		CD24		CD36
BST2		RAMP1		BST2
GZMA		GUCA1C		GZMA
PLXDC2		BCL11A		PLXDC2
DDX60		TPBG		DDX60
DPP10		SCN2A		DPP10
DTX3L		TMEM35		DTX3L
EDNRB		SSTR2		EDNRB
RGS1		HS3ST4		RGS1
IFI44		SEC14L5		IFI44
ATP10D		CD19		ATP10D
SULF2		SLC16A9		SULF2
CCND1		GUCA1B		CCND1
TMEM45A		SLC27A6		TMEM45A
FXYD5		FLJ37786		FXYD5
FAT1		ROBO1		FAT1
PLAT		PRAME		PLAT
FAM150B		AGT		FAM150B
PARP12		ANK3		PARP12
MMP9		ID4		MMP9
TMEM47		ATP1A2		TMEM47
PSMB9		RDH12		PSMB9
OLFML3		SAG		OLFML3
CCL4		NDP		CCL4
OGN		CLUL1		OGN
INSM2		SLC6A1		INSM2
IFIT1		ROM1		IFIT1
MX1		RASGRP1		MX1
COL15A1		BCHE		COL15A1
FBLN5		PPEF2		FBLN5
IFI44L		GNAT1		IFI44L
AKR1C3		LRRC39		AKR1C3
TAP1		PLA2G5		TAP1
PRSS33		RHO		PRSS33
PLP1		GPR160		PLP1
SOX9		USH2A		SOX9
GFAP		IMPG1		GFAP
CXCL10		FABP7		CXCL10
PTPRZ1		WIF1		PTPRZ1
DCX		PDE6A		DCX
TFF1		CNGA1		TFF1
POU4F2		DNER		POU4F2
GRM6		PRSS35		GRM6
RDH12		RP1		RDH12
CNGB1		SYNPR		CNGB1
GNAT1		TF		GNAT1
SAG				SAG
GABRG2				GABRG2
RHO				RHO
PTX3				PTX3
PPEF2				PPEF2
IMPG1				IMPG1
CABP5				CABP5
GRIA2				GRIA2
GUCA1B				GUCA1B
PVALB				PVALB
PDE6A				PDE6A
RS1				RS1
CNGA1				CNGA1
NEFL				NEFL
ISL1				ISL1
WIF1				WIF1
				CD24
				RAMP1
				BCL11A
				SSTR2
				HS3ST4
				SLC16A9
				SLC27A6
				ROBO1
				PRAME
				NA
				NA.1
				AGT
				ANK3
				ID4
				ATP1A2
				NDP
				CLUL1
				SLC6A1
				ROM1
				RASGRP1
				BCHE
				LRRC39
				PLA2G5
				GPR160
				FABP7
				DNER
				PRSS35
				TF
