# Supplementary material for: Bioinformatics analyses of retinoblastoma reveal the retinoblastoma progression subtypes
Source: PeerJ. 2020 May 21;8:e8873. doi: 10.7717/peerj.8873 (PMC7246025; doi:10.7717/peerj.8873)
Supplement: Supplemental Information 11 [file peerj-08-8873-s011.xls]

## Sheet: overlap
Supplementary Table 3. The comparison of subtype specific genes between our study and previous study
ourstudy	previous study	overlap
MAP3K8	TFF1	CYBRD1
SULT1C2	TPH1	CXCL14
PTGER2	CD24	EFEMP1
BACE2	CTCFL	COLEC12
KMO	REXO1L1	FAP
CYTIP	GLRA1	TRPM3
GPX8	KCNQ5	DHRS3
FAM110C	OR2J3	MAN1A1
FCGR2B	MUC12	CCDC80
CCL18	TFAP2D	PPAP2B
CPVL	EBF3	GULP1
CYBRD1	LOC440570	SERPING1
PLBD1	UIMC1	RBMS1
TNFSF13	RFC1	PRELP
BMP4	OR2J2	RRAS
CLIC6	LPPR5	VWA5A
SLAMF8	SPP1	RAB31
C1orf168	MDGA1	DAPL1
SLC47A1	USP17L6P	CRYAB
TYR	SPRR2A	TRPM1
RARRES1	IGHD	PYGL
HMOX1	OR2M1P	MAB21L2
MYOF	HTR1A	C3
HSD17B2	TBR1	TRIM22
F13A1	OR1C1	CFI
PYCARD	OR2J1	ANXA4
MGC24103	LOC100132147	SPOCK1
SFRP1	OR10K1	ADAMTS1
ITGAM	FLJ16171	HLA-DRA
CXCL14	DUX4L4	LYZ
GLIPR1	IGHV4-59	CHI3L1
ALDH1A1	OR6K2	TTR
ADORA3	HORMAD1	HLA-DPA1
NCF2	NPVF	IFI16
OCA2	OR2W1	DSP
KCNJ13	LCN8	BMPER
EMP3	ROBO1	CADM2
LY96	OR6Y1	FOS
TPD52L1	GOLGA6L1	LUM
MITF	ND2	CP
SLC39A12	SPRR2E	SCN2A
MLANA	TRPC5	SPRY2
VSIG4	OR6K6	CAV2
C1S	LOC400968 // LOC400968	RASSF2
COL8A2	OR12D2	SATB1
CTSD	USP17	RCAN2
EVI2B	OR4D10	CAV1
IER3	HSD3BP4	GUCA1C
SQRDL	IGLJ3	PTGFR
CFD	OR4C13	PAX6
TMEM27	OR6N2	FRZB
SOSTDC1	OR4C46	CLU
CCL8	KRTAP4-7	RLBP1
TYRP1	KRTAP4-12	PCP4
PIR	PRR20A	PHLDA1
TMEM140	DUX4	SULF1
BCMO1	OR14J1	RP1
EFEMP1	PTCH2	USH2A
GIMAP2	LCE1B	C8orf46
TSPO	ROBO3	SERPINA3
CTSC	OR2T12	GPX3
SMOC2	OR5D16	SLFN13
BTN3A3	PRSS2	SYNPR
SLC2A12	RHO	NPVF
NID2	OR2T27	DAB2
HCK	KRTAP9-8	NCEH1
COLEC12	REXO1L2P	ST6GALNAC2
OLFML2B	GAGE12J	PLXDC2
FAP	LLPH	EDNRB
CFH	TOB2	SULF2
TRPM3	LOC100128364	TMEM47
CTSS	FLJ35934	FBLN5
CD163	OR2T33	PLP1
CSF2RB	GAGE12B	GFAP
ARHGEF3	GAGE12I	PTPRZ1
MNDA	SPRR2B	TFF1
TNFRSF1A	KRTAP10-4	RDH12
CXCL16	LY86-AS	CNGB1
EVI2A	GRIK3	GNAT1
AIM1	GAGE12G	SAG
CTSK	MMP12	GABRG2
LY86	USP17L2	RHO
FERMT3	SOX14	PPEF2
SLC2A10	SIAE	IMPG1
DHRS3	KRTAP4-11	CABP5
CCR1	ERVFRDE1	GRIA2
BMP2	OR6C76	GUCA1B
BLNK	OR6N1	PVALB
C1R	OPN1LW	PDE6A
IL6	OPN1MW2	RS1
FBP1	OPN1MW	CNGA1
ID3	IMPG1	NEFL
RCSD1	GUCA1C	ISL1
MS4A6A	SAMD7	WIF1
IL10RA	CNGB3	CD24
HTR2B	CPLX4	ROBO1
SERPINE1	FBLN5	PRAME
TIMP3	PLA2G5	AGT
MAN1A1	RAB41	ANK3
HS3ST2	SPARCL1	ATP1A2
MICA	RS1	NDP
GPNMB	LRIT3	CLUL1
CSTA	SERPINA3	SLC6A1
CCDC80	C5orf36	ROM1
GPR34	UTY	RASGRP1
NUPR1	LRRC63	LRRC39
PPAPDC1A	SLC24A2	PLA2G5
S100A11	SLC24A5	GPR160
C2orf40	OLAH	FABP7
IL13RA2	UGCG	DNER
HCLS1	PGM3	PRSS35
RSPO3	SLFN11	TF
RPE65	LRRC39
PPAP2B	HSPC159
CFH /// CFHR1	RP1
YAP1	NUP93
CHST11	ARL6IP5
LGALS3BP	ARR3
GULP1	RB1
C1QA	SLFN13
MPEG1	CYorf15A
FCGR3B	PRUNE2
SELENBP1	MPP4
KRT18	USP10
TNFSF13B	HOOK1
SELM	GPR160
CEBPD	SNORD116-13
HLA-DMA	C6orf191
SLC7A7	DDX3Y
RNASE4	RTBDN
CTGF	CC2D2A
CHI3L2	GABARAPL2
THBS2	ACAT1
FCER1G	USP9Y
SLC38A11	ZDBF2
WNT5A	SCN2A
MS4A4A	PLEKHB1
SLC35D3	CLU
GBP3	NDUFB5
MLPH	ANXA1
SERPING1	SLITRK6
FCGR1B	TSPAN7
SSPN	C4orf11
CYR61	ATPBD4
IL33	BBS2
BAMBI	IDH3A
PTGDS	CISD1
ANXA3	IQGAP2
CH25H	GNAT2
LGI1	CCDC146
S100A8	GNGT2
MS4A7	B3GALTL
PPIC	C3orf1
LAPTM5	RHOBTB1
HTRA4	MIR217
C5AR1	C16orf80
VAMP8	SCP2
C3AR1	ITFG1
TSPAN8	SCG3
GIMAP6	ZNF702P
TLR1	TMX3
RBMS1	CCDC72
LOX	USH2A
BGN	FAM190A
TMEM35	AP1G1
ITGB2	SGIP1
C1QC	TM7SF3
MGP	PRELID2
SELL	BBS4
RAB38	IFI16
SNX9	ANKRD6
CYB5R2	LYN
PRELP	SNORD116-29
RRAS	MYO3B
NMI	JHDM1D
RARRES2	VPS35
ENPP2	NDUFA2
VWA5A	GABRE
RAB31	ZMAT1
DAPL1	HINT2
NTN4	SPARC
ADAMDEC1	SNX2
SLC16A4	NAE1
WLS	PSD3
CXCL12	DZIP3
VCAM1	S100A10
CSGALNACT1	IL6ST
LSR	PLCD4
CRYAB	UBR7
LXN	ZBTB38
C1QB	PUS7L
GALNT10	MSR1
TRPM1	CHMP2A
PYGL	C7
MAB21L2	EFTUD1
ARHGAP18	CKMT1A
ID1	DNAJA2
EPDR1	SCRN3
C3	PSMA6
PLA2G4A	ATRX
EGR2	ACTR10
S100A4	ANKMY2
DKK1	COX7B
TRIM22	GINS2
FAM129A	SAMD12
ODAM	PGCP
LY75	TERF2IP
MAN2A1	TEX9
CNTN3	ITGAV
TCIRG1	RAB18
DACT1	SAT1
RNASE6	C12orf11
CFI	ATP6V1D
FNDC1	PDE6C
TGFB1I1	ACADM
ANXA4	NDUFS3
RARRES3	SULT1C4
PLA2G7	HMOX2
SPOCK1	GNG12
S100A9	GABRG2
ADAMTS1	HARS
CD14	CREG1
CCL2	PDE6H
HLA-DRA	ABCA4
TFPI2	IKZF5
IGFBP6	SESN1
METRNL	TXNDC12
CYP24A1	FBXO25
PPL	ELTD1
COL3A1	RPS4Y1
COL9A3	GABARAPL1
BCL2A1	TMOD2
LYZ	KLHDC2
CEBPB	COPZ1
BAG3	PTPRZ1
ALDH1A3	ITPR2
CAPG	TMEM194B
CD52	RAB28
CHI3L1	NEDD4
TRIM6	TTN
TTR	EYS
GJA1	SERPINF1
GBP2	CADM2
HLA-DPA1	SV2B
SRGN	FLT1
GPR143	FAM63B
BTN3A2 /// BTN3A3	CPE
IFI16	RPGRIP1L
TYROBP	SLC1A4
COL1A2	CCPG1
DSP	METT5D1
IFITM1	GTF2A2
CCL3 /// CCL3L1 /// CCL3L3	MAP1LC3B2
MMP7	EPB41L3
GBP1	SNRPN
ERMN	CHD9
TMEM200A	KIAA1107
PON2	PDC
ZCCHC24	APOO
HBA1 /// HBA2	KDM4C
BMPER	MNS1
CADM2	WDR17
HBG1 /// HBG2	C14orf179
FOS	MOCS2
GREM2	NIPAL2
HBB	RBL2
FZD7	DYNC2H1
NXPH1	CCDC141
COL6A3	C6orf211
SLC16A14	CXorf22
LUM	SLC12A5
HLA-DQA1	EPB41L2
CP	C16orf61
PSMB8	RGS9
SCN2A	SNAP25
SPRY2	SLC35A5
CHIT1	PSMB6
LOC100288911	SLC24A4
FGF13	NETO1
PLSCR4	ELOVL4
PLAGL1	C1GALT1
CAV2	CCDC148
EGF	IFT74
PHACTR2	ZFP1
COL11A1	CETN3
SRPX	WRB
KIRREL3	HIGD1A
EGFL6	C3orf15
RASSF2	NSMCE2
SATB1	SNORD116-26
FLJ37786	APC
RCAN2	HSD17B12
CAV1	GTF2H2
DEFB119	PIH1D2
RBM24	MAMDC2
GUCA1C	LHFP
CD19	RAD17
CTHRC1	CA2
C15orf48	PALB2
LOC100130458	TMEM30A
PTGFR	TRAPPC4
PAX6	GRAMD3
IGJ	SLC25A12
CYP1B1	TLN2
FRZB	GTF3C6
MXRA5	ARL2BP
CLU	ZNF382
ADRA2A	SCARNA9
DCN	DPY19L4
RLBP1	ECH1
FAM19A2	SNX14
SOX8	FGD4
PCP4	SNORD116-25
PHLDA1	SDHB
SULF1	SVOP
RP1	NRXN1
SEC14L5	LPCAT1
AMIGO2	FAM19A4
USH2A	TCP11L2
VSTM2A	GLCE
C8orf46	SC5DL
SERPINA3	HSBP1
VCAN	LGMN
SOX7	TNR
GPX3	ANK2
SLFN13	B4GALT6
SYNPR	GNAT1
TPBG	OGFOD1
NPVF	PLTP
GPR183	PHLPP2
CASP1	AARS
RTP4	MTMR7
AQP9	RPP14
FZD6	VPS13C
PTPRC	SAR1B
DAB2	MANEA
FGL2	RGNEF
CYYR1	CIRH1A
TNFSF10	LRIT1
NCEH1	ACBD5
LAMB2	PTPN13
TM4SF18	FAM172A
FOXC1	MYL12B
ST6GALNAC2	SLC16A6
GIMAP7	DPY19L2P2
IL4I1	CCNE2
CD36	MRPL46
BST2	MAPKSP1
GZMA	KCNV2
PLXDC2	C11orf54
DDX60	TMEM111
DPP10	FBXO16
DTX3L	SETD3
EDNRB	WIF1
RGS1	COG4
IFI44	NTRK2
ATP10D	FTO
SULF2	MERTK
CCND1	PPT1
TMEM45A	NIT2
FXYD5	KLHL4
FAT1	LMAN2
PLAT	RRM2B
FAM150B	PYROXD1
PARP12	C8orf37
MMP9	LRRC34
TMEM47	ATP6V1C1
PSMB9	GABRA3
OLFML3	MIOS
CCL4	FAM161A
OGN	IFT57
INSM2	CAB39L
IFIT1	RDH12
MX1	CLK4
COL15A1	METTL9
FBLN5	EFNA5
IFI44L	GTF2B
AKR1C3	COPS4
TAP1	BNIP2
PRSS33	RPGRIP1
PLP1	NBR1
SOX9	BBS7
GFAP	EXOSC8
CXCL10	SLC30A9
PTPRZ1	LRCH2
DCX	PTPRD
TFF1	TMEM106B
POU4F2	GNAL
GRM6	KIAA0776
RDH12	ACSL1
CNGB1	HERC3
GNAT1	RAGE
SAG	SCML1
GABRG2	DSTN
RHO	TXNIP
PTX3	KARS
PPEF2	CEP290
IMPG1	SEC11C
CABP5	CYorf15B
GRIA2	PSMA4
GUCA1B	ARHGEF9
PVALB	LOC220594
PDE6A	FRMPD2
RS1	TTC35
CNGA1	IFT88
NEFL	TBC1D19
ISL1	CRYAB
WIF1	SNORD45B
CD24	CCDC88C
RAMP1	ASPM
BCL11A	CENPF
SSTR2	MKI67
HS3ST4	HIST1H2BB
SLC16A9	UHRF1
SLC27A6	TOP2A
ROBO1	PRAME
PRAME	NUF2
AGT	KIFC1
ANK3	HIST1H3B
ID4	HIST2H3D
ATP1A2	HIST1H1B
NDP	HIST1H3D
CLUL1	HIST1H4D
SLC6A1	TPX2
ROM1	NCAPG
RASGRP1	ATAD2
BCHE	PRC1
LRRC39	HIST1H4K
PLA2G5	HIST1H3I
GPR160	DTL
FABP7	HIST1H4L
DNER	ARHGAP11A
PRSS35	ANLN
TF	HIST1H2BM
	HIST1H3J
	KIF15
	SKA3
	HIST1H4J
	HIST1H2AI
	KIF14
	KIF11
	CASC5
	KIF20A
	HIST2H3A
	SUMO1P3
	HIST1H2AB
	PBK
	EXO1
	HIST1H3F
	HIST1H3H
	CCNB2
	FOXM1
	CKAP2L
	LOC440570 // LOC440570 // LOC440570
	UBE2T
	BUB1
	KIF23
	NUSAP1
	PLK1
	DLGAP5
	HIST1H4C
	BRIP1
	CKAP2
	NEK2
	HIST1H2BL
	BUB1B
	ARHGAP11B
	HIST1H2AM
	CKS1B
	HELLS
	NDC80
	OR2B6
	TYMS
	MLF1IP
	HIST1H2BO
	XRCC2
	HMGB2
	CHRNA5
	MYCN
	HIST1H2BH
	RAD51AP1
	NEIL3
	CDCA7
	SMC4
	SNORD15A
	SGOL1
	E2F7
	CENPI
	ZNF826P
	FAM72D
	MYBL2
	TPRX1
	TCF19
	SSX4
	CKS2
	CDC45
	CDC6
	CDK1
	ZNF730
	C14orf106
	MYBL1
	RRM2
	MCM7
	GAS2L3
	CHEK1
	DIAPH3
	TTK
	HIST1H3C
	PLK4
	HSPA1B
	C15orf42
	OR2T5
	CT45A6
	CEP55
	HIST1H4A
	CDCA2
	ESCO2
	SNORA62
	CENPA
	NCAPG2
	PTTG1 // PTTG1
	HIST1H2AL
	RTKN2
	FBXO5
	CDKN3
	AURKB
	CENPO
	CT45A1
	OR2T29
	MCM3
	GPR63
	SNORD28
	OR10A2
	SNORA56
	MMS22L
	FAM83D
	FAM111B
	TRIM59
	GNG4
	KIAA0101
	DCT
	HIST2H2AA3
	STIL
	HIST1H2BE
	ITPR3
	HIST1H2BJ
	SPAG5
	HIST2H2AC
	GJC1
	DNA2
	LDLRAD3
	IQGAP3
	MCM10
	HJURP
	DEFB105A
	OR2T2
	UBE2C
	FANCI
	OR2T35
	BRCA2
	TEX15
	OR6C3
	OR8B2
	OR10R2
	CENPK
	OR13C4
	OR52J3
	HIST1H2BC
	LBR
	HIST1H2BF
	OR4C12
	CDCA5
	UGT2B7
	SNORA71C
	PRR11
	HIST1H2BK
	AURKA
	NCAPH
	SNORD15B
	HIST1H4B
	OR6P1
	GMNN
	OR5F1
	GGH
	CENPJ
	MCM6
	SNORD12C
	MELK
	OR12D3
	C6orf218
	C15orf51
	OR52N5
	HIST1H2AK
	TRIM43
	FANCA
	CSNK1G1
	CT45A2
	LOC1720
	POLH
	GINS1
	SNORA38B
	RFC3
	SNORA71B
	OR5A2
	BAGE2
	POLE
	CRISP1
	OR4F21
	LOC100130876
	SLCO4C1
	ZNF850
	OR2B3
	KIF18B
	CDC25A
	SNORA38
	UBE2S
	E2F8
	MTHFD2
	OR8B3
	HIST1H3A
	TMSB4X
	DCC
	TMSB15A
	FANCE
	C1orf129
	OR6C74
	OR6C75
	PRIM2
	OR4F16
	OR4A47
	LOC51152
	DEPDC1
	OR14A2
	MCM5
	OR52B4
	KIF20B
	OR4F17
	TRIM22
	CT45A3
	OR8H2
	TAAR3
	HIST1H4H
	GCM1
	OR8K1
	OR9G1
	DEPDC1B
	ZNF367
	ZNF679
	OR5M3
	PMAIP1
	LAMB1
	KRTAP21-1
	LOC100288034
	SNORA42
	CT45A4
	OR51F2
	HIST1H2AG
	OR52K3P
	OR10G9
	SSRP1
	VANGL2
	RAD54L
	SYK
	TMEM97
	RAD51
	UGT2B10
	MCM2
	OR10X1
	CYP4A11
	SNORA4
	PIM1
	OR1A2
	CRISP3
	CDC20
	SMC2
	DEK
	SPRYD5
	OR51G2
	ND6
	EYA2
	DHFR
	SSX2
	USP49
	LOC339240
	OR4H12P
	SSX7
	KIF4A
	KRTAP9-2
	TRIM49
	KIF2C
	OR4C45
	CCNA2
	CTPS
	OR2T34
	CCNA1
	MIR509-1
	RACGAP1
	OR52B6
	KIF18A
	MAD2L1
	SRXN1
	OR52L2P
	DEFB114
	OR2T3
	PIWIL2
	OR2M5
	SNORA75
	ZWINT
	TACC3
	LOC400968
	OR10J3
	OR13C3
	OR51L1
	OR10J1
	OR13F1
	TAAR6
	CENPE
	CT45A5
	OR52E6
	SCARNA10
	ST8SIA2
	TROAP
	OR51H1P
	OR5V1
	KCNT2
	MCM4
	HIST1H2AE
	OR8K5
	OR10H2
	P2RY10
	HLA-DQB1
	POM121L2
	SLC17A3
	TAS2R16
	FAM64A
	PAR4
	SAG
	PDE6A
	PVALB
	SNORD115-32
	CRABP1
	CP
	ALDOC
	PDE6G
	RRH
	TF
	RASSF2
	CLUL1
	C4orf49
	MIR9-2
	ANK3
	RLBP1
	C3
	CNGA1
	NEFL
	FRZB
	GNGT1
	LIX1
	KDR
	SNORD114-3
	SNORD115-44
	SPON1
	CABP5
	SNORD115-11
	PAX6
	PCDH15
	VSNL1
	RGR
	SNORD115-25
	DKK3
	SNORD115-42
	SNORD115-6
	CALB2
	SNORD115-1
	ABI3BP
	SNORD115-33
	GRIK1
	AQP4
	RDH10
	SYNPR
	SNORD115-26
	SNORD115-12
	SEMA3A
	FAM169A
	ABLIM1
	VAT1L
	SLC6A1
	C1orf61
	SULF1
	SLIT2
	UNC13C
	GPX3
	SLC1A3
	CALB1
	C20orf103
	PLXDC2
	NDRG4
	GNAO1
	GABRG3
	PPEF2
	TMEM47
	NFIA
	VIM
	BSPH1
	BBS9
	BHLHE41
	ZBTB20
	TMEM232
	CAV1
	DNER
	FAIM2
	GFAP
	MIR218-1
	SNORD115-20
	NRXN3
	GPR37
	C1QTNF3
	NT5E
	STAC2
	GPR137B
	STAT3
	PCP4
	CCND2
	ITM2B
	CFI
	C4A
	HLA-DRA
	NAP1L3
	GABRA1
	NEFM
	EPAS1
	CHI3L1
	TTR
	NR2E3
	ASAH1
	SORBS2
	GNB1
	FABP12
	GABRR1
	ABHD12B
	RASGRP1
	KIF5C
	RCAN2
	LSAMP
	CNTN4
	EIF1AY
	SEL1L3
	NRL
	IGFBP5
	OPCML
	ENPP5
	CADM1
	ST6GALNAC2
	SNCB
	BCL6
	RGS7BP
	HLF
	TNIK
	TGFB2
	HLA-DPA1
	MXRA7
	GPRC5B
	PLOD2
	RAB3A
	HES1
	LUM
	PRSS35
	DMD
	EDNRB
	MYO6
	PRKCA
	GRIA1
	ATP1A1
	PYGL
	NLGN4Y
	PDE8B
	EFR3A
	SH3BGRL
	TRDN
	SEPP1
	MID2
	DENND4A
	PTN
	CHRDL1
	NGFR
	RBMY2EP
	PDE3A
	PRPH2
	ROM1
	PHYHIPL
	MAPRE3
	DCLK1
	FBXO32
	MAPK10
	REEP5
	ATP2B4
	CRYAA
	NFAT5
	FAM19A3
	SLC4A10
	SH3BGRL2
	KIAA1147
	ANXA6
	AHR
	LRP1
	WDR47
	APLP2
	GRIA4
	PCDH9
	AHCYL2
	NFE2L2
	PLP1
	ANGPTL1
	FAM138A
	SNORD115-30
	ATP1A2
	GUCA1B
	SATB1
	ID2
	KIAA1377
	MT1F
	ST3GAL5
	SPOCK1
	RNF150
	SLITRK2
	RBMY1A1
	FAM138B
	GPM6B
	SORBS1
	LIN7A
	KDM5D
	RDH8
	MBNL2
	MAP7
	SNORD114-26
	NR2E1
	ABLIM3
	RBMY1B
	CHL1
	PDE6B
	PPAP2B
	SPRY2
	SNORD115-7
	IDS
	LIMCH1
	IDE
	SOX2
	MEF2C
	NDFIP1
	SLC7A8
	CNN3
	FOS
	LGR4
	KCNJ10
	CDH12
	ME1
	ATP6V0A1
	GULP1
	SERINC5
	AMY2B
	GPR155
	ETV5
	PCMTD1
	SERPING1
	STK35
	CNGB1
	PODXL
	UFSP2
	GOLIM4
	NCEH1
	ABCD2
	PFN2
	SLC15A2
	GRB10
	EFEMP1
	HSPB8
	TDRD7
	VAMP2
	C5orf4
	TOX
	RAB31
	PRKAA2
	SLC7A11
	NEBL
	CD59
	SNTB2
	SLC24A1
	SFMBT2
	PRNP
	DAB2
	IDH1
	ALDH2
	SLC25A4
	VTN
	CALM1
	CD74
	LRP2
	DLG2
	SGK494
	TMBIM1
	CD9
	CD44
	LDOC1
	FAM160A1
	2003-03-01
	ELSPBP1
	TFAP2B
	SLC17A7
	BBX
	PPP2R2B
	NDRG2
	COQ10B
	GLUL
	IFT46
	IL13RA1
	GOT1
	KIF21A
	ZIC1
	MAP1A
	A2M
	RASSF4
	SEC62
	NAPB
	LYRM5
	KCNB1
	TSPAN31
	RGS8
	MT2A
	IMPAD1
	C5orf30
	YPEL2
	ATP6V0D1
	MCF2L2
	MPP7
	LITAF
	CD47
	IGSF11
	DAPL1
	CYBRD1
	LPCAT2
	ETV1
	KCNA2
	APBB2
	SLC4A4
	CHP
	ANXA4
	UNC119
	NTM
	HLA-DPB1
	GUCY1B3
	RNF170
	FRMD4B
	FGF14
	PMP22
	AAK1
	PDE6D
	TMEM9B
	COX5B
	CNTNAP4
	CAMK2D
	LPAR6
	ADAMTS1
	LIFR
	C4orf31
	PCSK2
	RNPC3
	DTNA
	LRRN3
	NPTN
	ELMOD1
	CAMK2N1
	PPP3CC
	TES
	CACNA2D4
	NUDT4P1
	FABP7
	DOK5
	CACNG3
	GABBR2
	CARTPT
	GNAI2
	FAM127A
	PARVA
	KBTBD10
	PDCD4
	KIF5A
	CPNE6
	DDC
	CAPZA2
	BCL2L13
	RHOJ
	STAM2
	CYP4V2
	GLB1L2
	THRA
	PCMTD2
	EZH1
	TAOK3
	TCF4
	NCOA3
	NME5
	MEIS1
	AMN1
	GLS
	ATP6V0D2
	B3GALT1
	LPHN2
	TOB1
	MAOB
	INTU
	CTTNBP2
	ELP4
	TAGLN3
	DUSP1
	USP46
	TPD52
	ARHGAP26
	BTD
	ZFAND6
	TTLL1
	C5orf41
	CX3CR1
	CAV2
	GABRB1
	SEMA7A
	LRRC4C
	KCNMA1
	SLC35F1
	CASZ1
	SNX10
	PGM2
	FGF1
	PPP1R3C
	ASPH
	LENG8
	PIK3C2A
	MT1G
	KLHDC1
	SLC38A3
	PROX1
	STXBP3
	NKIRAS1
	HCN1
	PAPD5
	PPIL6
	MCFD2
	PRKCB
	MYO5B
	KHDRBS2
	DHRS11
	RFTN2
	GRIA2
	TRPM1
	GRID2
	TMED10
	AK5
	CIRBP
	PADI2
	HIVEP2
	GNG7
	C20orf194
	ATP6AP2
	C10orf118
	CCDC113
	PLD3
	ATXN1
	DOCK10
	SESN3
	CD164
	PPARGC1A
	TPRG1L
	ZC3H6
	ENO2
	RASGRF1
	SNORD115-17
	SPTBN1
	TAX1BP1
	B3GALT2
	QDPR
	GPR158
	SGMS1
	AHNAK2
	CACNA1A
	LRRTM4
	ERRFI1
	EPB41L4A
	USP32
	KIAA0494
	TOM1L2
	DNM3
	SNORD115-38
	TFAP2A
	NPC2
	CHMP2B
	ZNF385B
	SPRYD3
	GOLGA4
	ATP6V1G2
	MFGE8
	TANC1
	SRI
	ARHGAP1
	GRK1
	RTN4
	RHPN2
	MAL2
	WBP2
	HLA-B
	RNF180
	PEBP1
	ATP6V1A
	STXBP1
	VAMP4
	TTC39C
	C8orf84
	LYSMD3
	PREX2
	GABRR3
	ACSL3
	RAB7A
	BBS10
	ZNF385D
	MSN
	SLC23A2
	IQCK
	KIAA1737
	SQSTM1
	PAM
	PTP4A3
	MAN2A2
	CSDA
	FAM59A
	PCYOX1
	CELF2
	ARHGAP10
	CXCL14
	PRKCZ
	DNAJB4
	UBE2H
	CHRNB3
	TRIM8
	PLCH1
	KIAA0564
	PDLIM5
	PION
	TOM1L1
	CITED2
	PIGB
	ZDHHC2
	VAMP3
	DCBLD2
	AMZ2P1
	OXR1
	ALS2CR8
	SYT1
	OLFM2
	OCLN
	TMEM138
	GUCY2F
	EVI5
	STX12
	IFI6
	USO1
	FAM69C
	MBNL1
	MYL4
	SC4MOL
	APP
	CLCN4
	FAM124A
	TMEM50B
	NFASC
	JAK2
	PRKACB
	CCDC92
	C10orf57
	ZHX2
	ABCG4
	NEURL
	PAR5
	KIAA1191
	LNX2
	C9orf6
	VPS37A
	ULK4
	SLC38A6
	HKDC1
	SNX25
	ARHGAP29
	RARB
	HTRA1
	CAPNS1
	VSX2
	GNPDA2
	AKAP11
	F3
	HK1
	MAGI2
	B4GALT1
	LRRIQ1
	SERPINI1
	ATP6V0E1
	KPNA6
	DSP
	TADA2B
	C6orf72
	WDTC1
	SNORD61
	FRMD5
	ZNF25
	DHRS7
	NT5DC1
	ATP1B2
	C7orf42
	COPS7A
	COLEC12
	LIN7C
	MTUS1
	TNC
	CTBS
	BHLHE40
	NDP
	NR1D1
	CNKSR2
	C14orf129
	FZD5
	RAB3C
	BEX1
	NCOA1
	ZNF483
	KPNA5
	ZFY
	ARF3
	KIF3A
	BCKDHB
	HERPUD1
	SPTAN1
	PIGK
	TSC22D1
	LRIT2
	HLA-A
	SLC7A2
	CRIM1
	LPHN3
	SLC4A7
	GOT2
	PHLDA1
	RUNDC3A
	MPDZ
	HADHB
	EPHA3
	MTIF3
	RIN2
	NDUFA4
	EGR1
	TRH
	LOC100128252
	PHC3
	ABCC5
	PPP2CB
	KCNIP4
	GTF2H5
	KIAA1826
	KLHL5
	TMEM167B
	NAPEPLD
	SELT
	CHURC1
	CTNND1
	LRTM1
	ABAT
	SPRED1
	AKTIP
	MFSD1
	DCTN6
	KIAA1024
	GAB1
	SLC46A3
	NAGK
	CTSA
	KIAA1217
	ADD1
	MRPL20
	REPS2
	GUCY1A3
	ZNF540
	SCAMP5
	PJA2
	SCD5
	NRIP3
	HEY2
	UCHL1
	SPG20
	C21orf34
	PDPN
	DDAH1
	YWHAB
	VPS13D
	RAB3IP
	C9orf150
	MPV17
	GOLGA5
	IFNAR1
	RBMS1
	N4BP2L2
	CLPTM1
	TCF7L2
	SNORD116-4
	PIK3CB
	KCNIP2
	APOC1
	FAM126A
	FZD3
	ST18
	SLC9A6
	HIBCH
	UQCRC2
	SEC14L2
	CCDC53
	UBLCP1
	HEATR5A
	GSTK1
	CD81
	CCDC66
	APOE
	2006-09-01
	SLC6A9
	NDFIP2
	SIK2
	RAB6B
	ACOT13
	SNORD116-27
	ATP6V1B2
	FAM171B
	DNAJC16
	SULF2
	MORN2
	RAB30
	TJP1
	NAPA
	C11orf48
	SGTB
	SPOCK2
	YPEL5
	RBFOX2
	TMEM49
	ATP5G1
	TJP2
	DNAH17
	SOD1
	TTYH1
	DDX6
	SYT11
	DAZAP2
	BTG1
	RAB5B
	MAP3K1
	LOC162632
	ERBB2IP
	F2RL2
	SRGAP1
	PITPNA
	KCND3
	PTPRM
	HIPK3
	CBLB
	HLA-J
	OAZ1
	RHOC
	DNALI1
	GM2A
	DYNLT3
	ANAPC16
	DGKE
	KIAA1109
	ARHGAP12
	CYBB
	SERF1A
	DUSP10
	CDH11
	SNORD82
	LONP2
	MEF2D
	CLCN3
	AMD1
	LARP4
	DHRS3
	HIF1A
	NRIP1
	PRELP
	RAP1GDS1
	MAN1A1
	SLC6A6
	PSMD10
	HLA-C
	MEST
	FBXO3
	TNFAIP1
	VAMP1
	EXOC6B
	NSF
	GCC2
	FHL1
	SPHKAP
	NCALD
	POC5
	NAPG
	UBE2Z
	JKAMP
	PPFIA2
	DNAJC6
	TRPM3
	OSBP2
	FAM135A
	FEZ1
	ERAP1
	CPEB4
	ADIPOR1
	LRIG1
	RAB14
	TMEM85
	RPH3A
	PTPRJ
	ALDH3A2
	WWP1
	SIPA1L1
	PRCP
	TMED4
	RRAS
	PPP3R1
	VPS41
	TRIP11
	CRYZ
	SLAIN2
	PCMT1
	B3GAT1
	CAPN7
	NBEA
	RALYL
	PACSIN1
	HIBADH
	JMJD1C
	C18orf32
	ORC3
	APOOL
	SSBP2
	ARL2
	GTF2IRD2B
	B2M
	NLGN1
	RIMS2
	TMEM66
	TRAK1
	BRP44L
	ATP6V0C
	ZNF780B
	ZBTB4
	AKIRIN2
	PREPL
	MFF
	PEA15
	CDK14
	KCNH5
	STK39
	REPS1
	PGK1
	RAPGEF4
	KLHL8
	PCYT1B
	UBL3
	SNAP23
	ATG2B
	KLF3
	2015-09-01
	AIG1
	KRCC1
	C10orf76
	MANBAL
	CETN2
	DNAJC19
	C1orf103
	MAP3K5
	TTC14
	NUDT7
	SEMA6A
	PIK3R1
	SLC4A5
	C2orf71
	CYB5D1
	KCTD7
	ANXA7
	DNAJC15
	PPP3CB
	BBS5
	UBE2G1
	RAB5C
	CAMTA1
	ABCA8
	PCBP3
	RNF141
	ZNF326
	KIAA0513
	TMEM37
	FAM36A
	GLB1
	TRIM2
	DPP8
	ZNF804A
	SAMD15
	DOC2B
	ARHGAP5
	PLCB4
	MPP5
	MDH1B
	SERINC1
	SERPINA5
	CROT
	GOLGA1
	C3orf23
	ARHGAP21
	INADL
	SNORD116-22
	LZIC
	ARV1
	SNORD49B
	CHAF1B
	POLE2
	KNTC1
	LAMA3
	SCARNA9L
	PRIM1
	PCNA
	MOP-1
	MBNL3
	WDR76
	BARD1
	C8orf46
	SNORA5A
	ASF1B
	TMEM194A
	SLC7A3
	IGF2BP1
	SPC25
	RRM1
	BTG3
	MSH6
	BLM
	EDA2R
	UNG
	CDC7
	DSCC1
	ZWILCH
	DPP4
	ATAD5
	SLC44A5
	DONSON
	CCDC67
	NPNT
	IDH2
	NMU
	C18orf54
	SNORD25
	KLF10
	PPAT
	ARNTL2
	FANCD2
	BMPER
	EZH2
	CENPN
	SMC1A
	SERTAD4
	SCML2
	BAIAP2L1
	SNORD54
	CASP8AP2
	NAALAD2
	KLF11
	LOC81691
	C5orf34
	CCNE1
	ZNF704
	FAM105A
	STRA6
	HIST1H1A
	AKAP5
	ZNF724P
	CENPH
	RBBP8
	SPATA18
	CENPV
	CDK2
	CDCA7L
	IGSF21
	SLC38A5
	RNASEH2A
	CCDC15
	SKA1
	NCAPD3
	WDHD1
	SNORD116-21
	BRCA1
	CORO1C
	ANKRD32
	C15orf23
	GPR125
	PDE1C
	SGOL2
	DKFZp686O24166
	POLA2
	BAZ1A
	FANCB
	GABRQ
	DDB2
	VRK1
	NCAPD2
	MASTL
	RBL1
	MND1
	ARHGAP28
	PTGFR
	ALK
	DSN1
	DMC1
	TOPBP1
	NUP155
	H2AFZ
	TNFRSF10B
	KIAA1524
	ABHD3
	SLC20A1
	PCDHB3
	MYB
	ANKRD18B
	KDELC2
	THBS4
	RFWD3
	GEN1
	RMI1
	FANCG
	MCM8
	DYNLT1
	POLD3
	SH3KBP1
	PRPS2
	SNORD4A
	NETO2
	C12orf48
	STOX1
	SNORD27
	CCNB1
	FANCC
	INTS7
	RFC5
	DDX12
	WEE1
	HAUS1
	N4BP2
	TMPO
	HAUS6
	GALNT12
	CEP78
	BUB3
	AHCY
	NT5DC2
	ISYNA1
	RFC2
	SNORD4B
	ALOX5
	SGCD
	NRM
	ZNF347
	LOXL1
	HMMR
	GKAP1
	DBC1
	MAPRE1
	USP13
	GINS3
	WSCD1
	PHGDH
	PTER
	RBP4
	RFC4
	POLA1
	KIF24
	ARPP19
	FADS1
	CIT
	MTHFD1
	MTBP
	FEN1
	MCOLN3
	E2F1
	TGFBR1
	CCDC60
	NASP
	PELI1
	STMN1
	SMC6
	SNRPB
	PAWR
	SNORA71D
	RBM15
	C20orf72
	EDIL3
	NFIB
	ITGB8
	NRN1
	GABRB2
	OLFM3
	CACNG2
	NKAIN2
	CACNG7
	G6PC2
	TBC1D9
	ANO3
	PKP1
	CLRN1
	PIP5K1B
	MDGA2
	VSX1
	PAPPA2
	PEBP4
	LRRC7
	GLRA2
	PPP1R1C
	MAB21L2
	SLN
	GLI3
	MED12L
	ODZ3
	PCDH11Y
	DPP6
	ISL1
	PRDM8
	ICAM1
	TMEM55A
	KCNIP1
	SLC17A6
	MEG3
	ATXN7L1
	HTR1F
	RGS7
	GNG13
	CADM3
	PPP2R2C
	CLIC5
	CHRNA6
	LEPREL1
	DRD1
	KCNJ3
	GSTA4
	KCNAB1
	CPA6
	CLVS2
	ELAVL3
	PLA2R1
	PLCB1
	LYZ
	DARC
	CCDC80
	FAM189A2
	BEND6
	PTPRG
	LRRN1
	STX1B
	SLITRK3
	MFSD4
	NAV2
	SV2C
	PCP4L1
	TMEM2
	PRKCE
	GPR12
	SLC24A3
	PDE5A
	GFRA2
	KIAA1045
	BMPR1B
	NAV3
	C9orf4
	GPR124
	TAPBP
	GALNT7
	HGF
	CRYM
	GPR85
	ERN1
	PDE7B
	HSPA12A
	VWA5A
	MOBKL2B
	DRD2
	MLLT3
	GRK7
	CTNND2
	KRT222
	SYT2
	SAMSN1
	RANBP3L
	NEFH
	LINGO2
	GABRG1
	ASAH2
	AGT
	SNCG
	OAF
	IGF1
	NOTCH2
	FAP
	PGM5P2
	TUBB4
	VASH1
	MTUS2
	HHATL
	OLR1
	KCNJ2
	CDH10
	TSHZ2
	SLITRK1
	PCDH18
	UST
	FEZF2
	DYNC1I1
	HLA-G
	OSBPL10
	BAALC
	FAR2
	RBPMS
	PCDH11X
